# Supplementary material for: Selective Determination of Glutathione Using a Highly Emissive Fluorescent Probe Based on a Pyrrolidine-Fused Chlorin
Source: MDPI journal article supplement (doi:10.3390/molecules28020568), 2023-01-05
Supplement: s1 [file s1]

*Supporting Information for*

# **Selective Determination of Glutathione Using a Highly Emissive Fluorescent Probe Based on a Pyrrolidine-Fused Chlorin**

Francisco G. Moscoso <sup>1,\*</sup>, Carla Queirós <sup>2</sup>, Paula González <sup>1</sup>, Tânia Lopes-Costa <sup>1</sup>, Ana M. G. Silva <sup>2</sup>  
and Jose M. Pedrosa <sup>1,\*</sup>

<sup>1</sup> Departamento de Sistemas Físicos, Químicos y Naturales, Universidad Pablo de Olavide, Ctra. Utrera km. 1, 41013 Seville, Spain

<sup>2</sup> LAQV-REQUIMTE, Departamento de Química e Bioquímica, Faculdade de Ciências da Universidade do Porto 4169-007 Porto, Portugal

\*Corresponding authors: [fjgarmos@upo.es](mailto:fjgarmos@upo.es) [jmpedpoy@upo.es](mailto:jmpedpoy@upo.es)

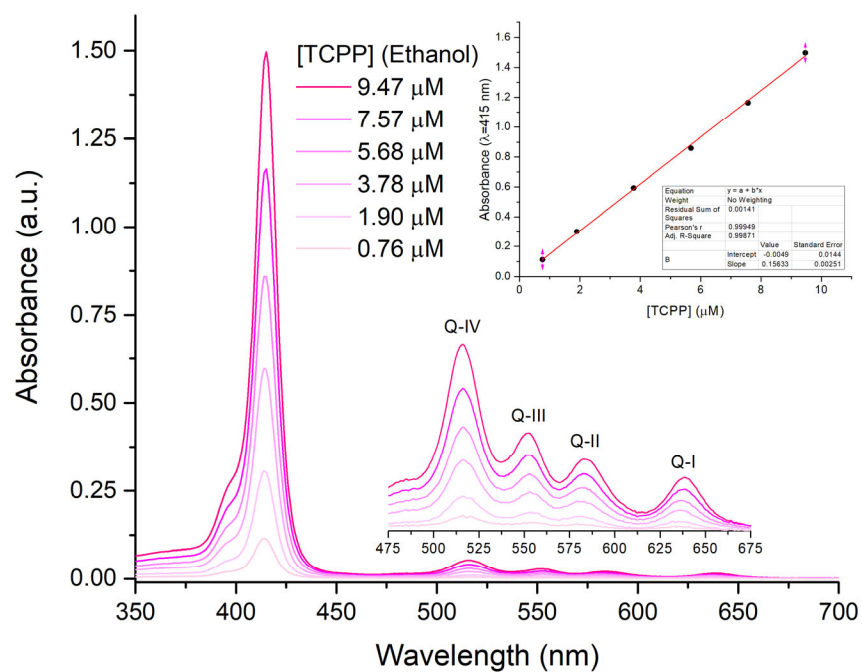

**Figure S1.** Absorption spectra of a methanol solution of *meso*-tetrakis(4-carboxyphenyl)porphyrin (TCPP) at different concentrations. Inset: linear fitting of the maximum absorbance vs. [TCPP].

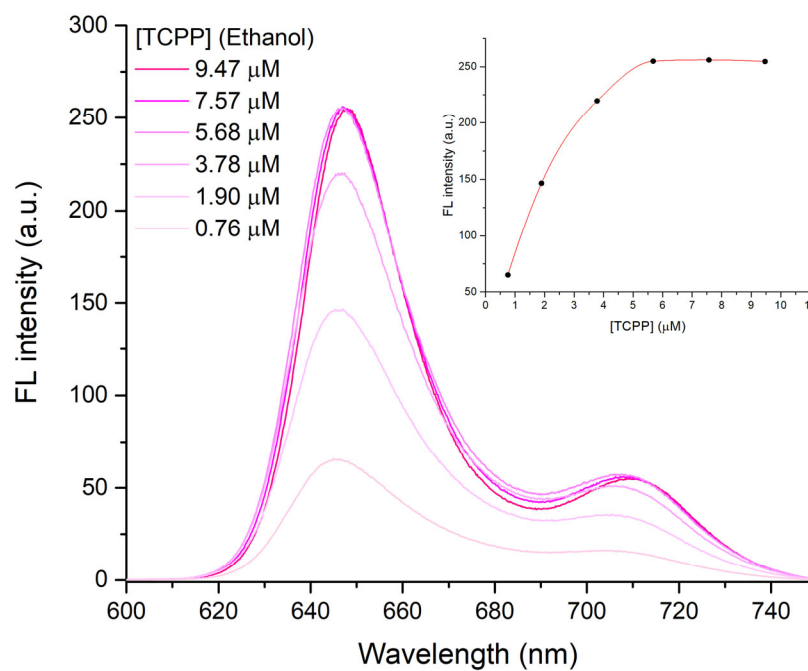

**Figure S2.** Fluorescence emission spectra ( $\lambda_{\text{ex}} = 415$  nm) of a methanol solution of *meso*-tetrakis(4-carboxyphenyl)porphyrin (TCPP) at different concentrations. Inset: FL emission intensity vs. [TCPP].

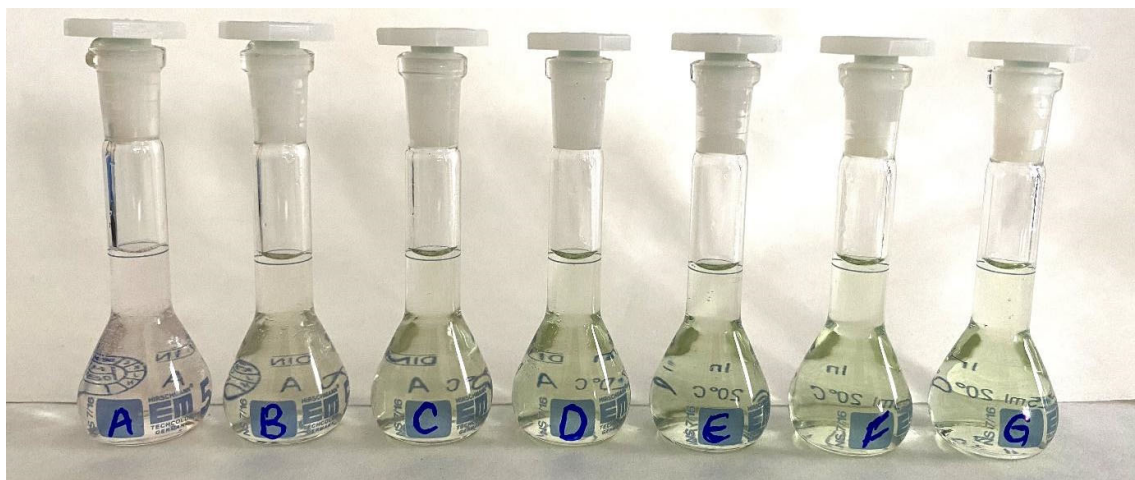

**Figure S3.** TCPC ethanolic solutions with different concentrations of  $\text{Hg}^{2+}$  (from A to G: 0, 6.11, 12.23, 24.43, 36.69, 48.91, 61.14  $\mu\text{M}$ ). See the main text for further details.

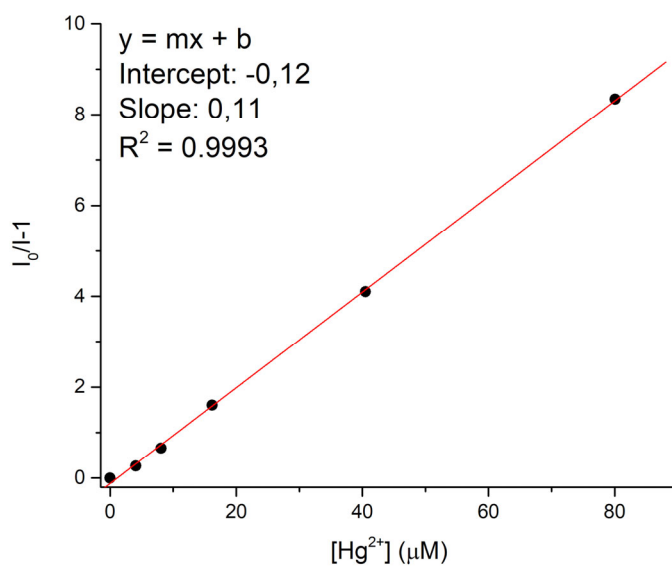

**Figure S4.** TCPC ( $[\text{TCPC}] = 6.15 \mu\text{M}$ ) fluorescence dependence with  $\text{Hg}^{2+}$  concentration (black dots) and its Stern-Volmer equation linear fitting (red line),  $\lambda_{\text{ex}} = 415 \text{ nm}$ ,  $\lambda_{\text{em}} = 650 \text{ nm}$ .

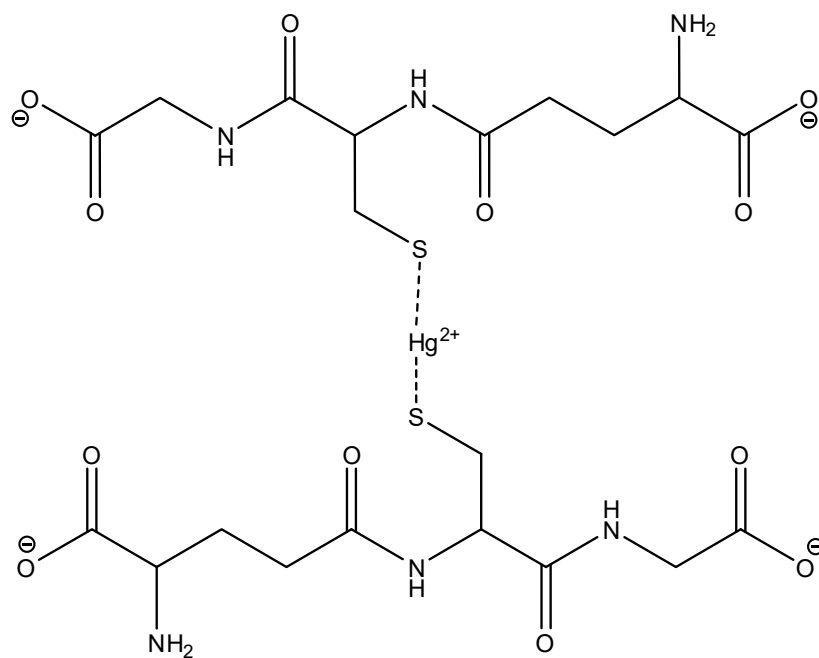

**Figure S5.** Schematic representation of the complex  $[\text{Hg}(\text{GSH})_2]^{4-}$  (see reference 69 in main article).

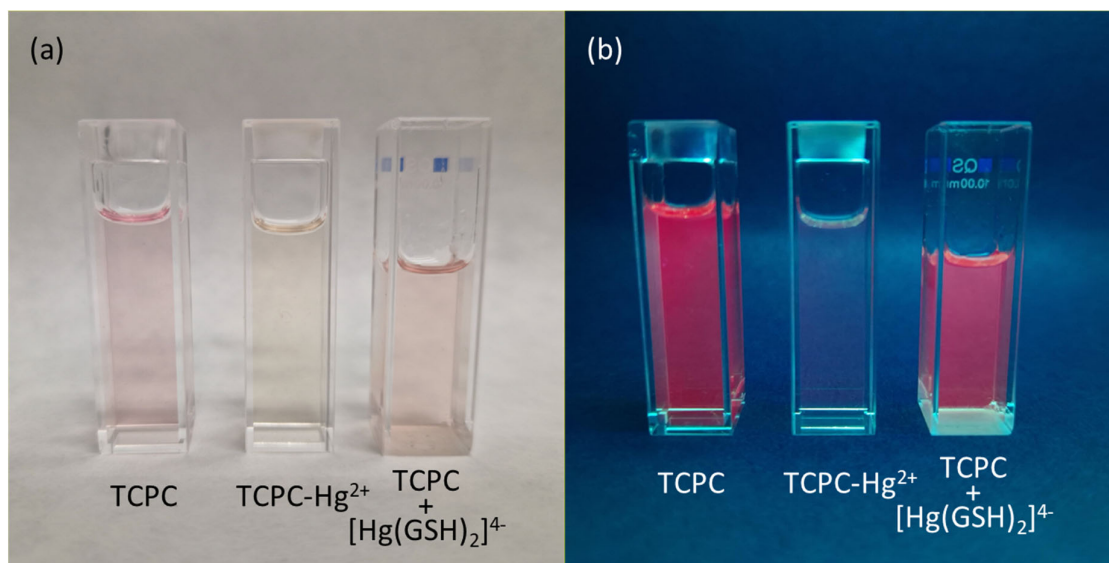

**Figure S6:** Photographs of cuvettes containing a TCPC aqueous solution (left), its corresponding TCPC- $\text{Hg}^{2+}$  complex (center) and after addition of an excess of GSH (right) under visible (a) and UV (b) light.

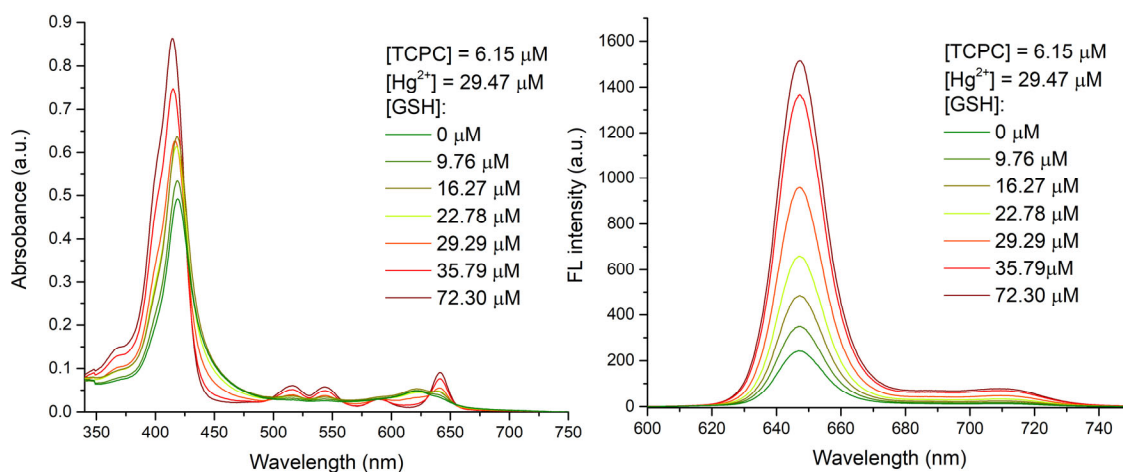

**Figure S7.** Absorbance (left) and fluorescence ( $\lambda_{\text{ex}} = 415 \text{ nm}$ ) (right) spectra of TCPC-Hg<sup>2+</sup> complex aqueous solutions (ratio 1:2) at pH 7.4 with different concentrations of GSH.

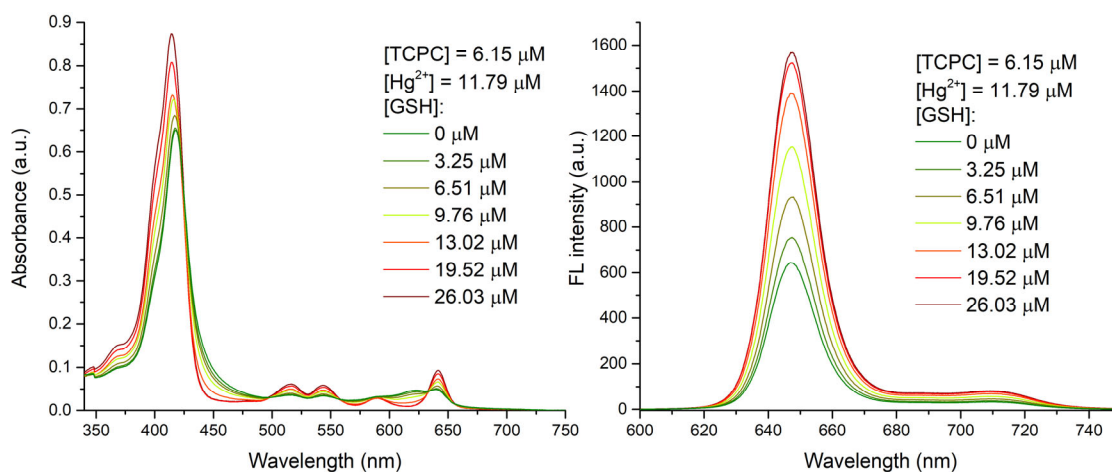

**Figure S8.** Absorbance (left) and fluorescence ( $\lambda_{\text{ex}} = 415 \text{ nm}$ ) (right) spectra of TCPC-Hg<sup>2+</sup> complex aqueous solutions (ratio 1:5) at pH 7.4 with different concentrations of GSH.

**Table S1.** Limit of detection and response rates of various fluorescent sensors toward GSH.

| Reference  | LOD     | Response rate |
|------------|---------|---------------|
| This study | 40 nM   | Seconds-order |
| 32         | 1.35 mM | 3-4 minutes   |
| 78         | 1.2 μM  | Not reported  |
| 80         | 0.3 μM  | Not reported  |
| 81         | 0.89 μM | Not reported  |
| 82         | 2.2 μM  | Not reported  |
| 83         | 0.48 μM | Not reported  |
| 84         | 0.96 μM | Not reported  |
| 53         | 16.2 nM | Not reported  |

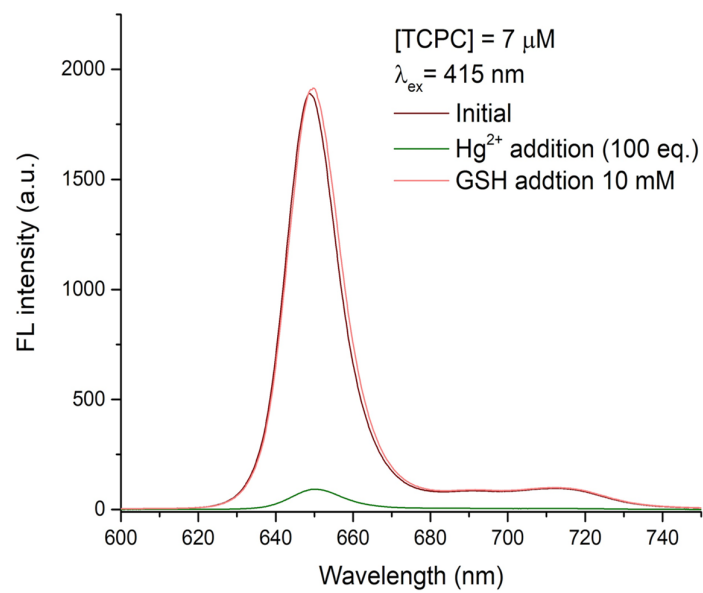

**Figure S9.** Fluorescence ( $\lambda_{\text{ex}} = 415 \text{ nm}$ ) spectra of aqueous solutions of TCPC, and the TCPC-Hg<sup>2+</sup> complex (ratio 1:100) before and after addition of 10 mM GSH at pH 7.4.
